# Supplementary material
Source: PubMed Central journal article supplement (PMC7307197)
Supplement: supp_RA119.011979_157236_3_supp_522752_q9t215.pdf [file supp_RA119.011979_157236_3_supp_522752_q9t215.pdf]

## Supporting Information

### **The post-synaptic scaffolding protein Tamalin regulates ligand-mediated trafficking of metabotropic glutamate receptors\***

\*Running title: Role of Tamalin in mGluR trafficking

Saurabh Pandey<sup>1\*</sup>, Namrata Ramsakha<sup>1\*</sup>, Rohan Sharma<sup>1</sup>, Ravinder Gulia<sup>1</sup>, Prachi Ojha<sup>1</sup>, Wei Lu<sup>2</sup> and Samarjit Bhattacharyya<sup>1,3</sup>

<sup>1</sup> Department of Biological Sciences, Indian Institute of Science Education and Research Mohali, Mohali, Knowledge city, Sector – 81, SAS Nagar, PO: 140306, Punjab, India.

<sup>2</sup> Synapse and Neural Circuit Research Unit, National Institute of Neurological Disorders and Stroke, National Institutes of Health, Bethesda, MD 20892, USA.

<sup>3</sup> To whom correspondence should be addressed: samarjit@iisermohali.ac.in, samarjitb@gmail.com

\* These authors contributed equally to this work

S. Pandey's present address: Synapse and Neural Circuit Research Unit, National Institute of Neurological Disorders and Stroke, National Institutes of Health, Bethesda, MD 20892, USA.

**Content:** Figures S1–S5

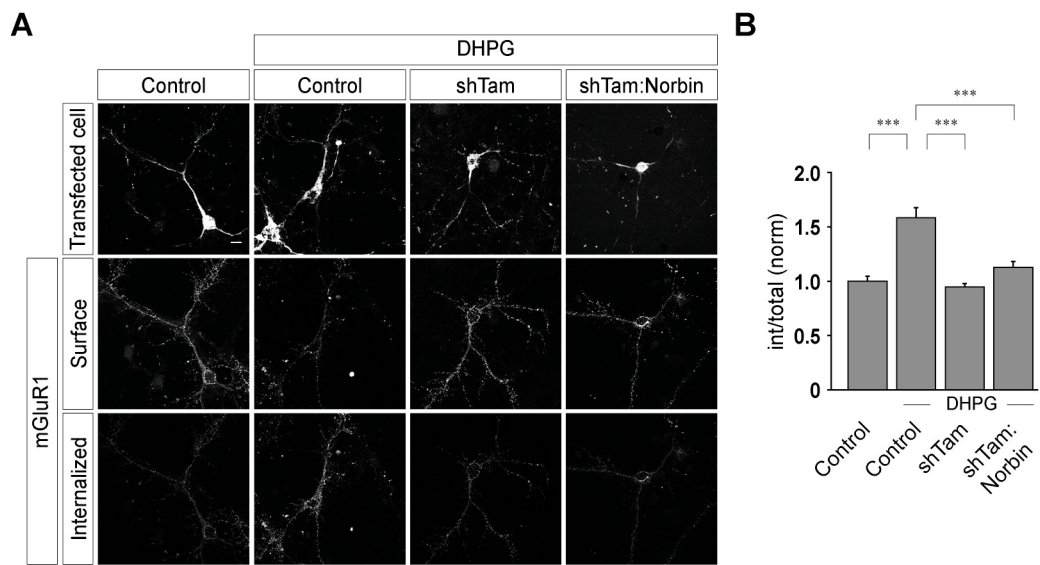

**Figure S1**

**Figure S1. Replacement of the endogenous Tamalin with Norbin does not rescue the ligand-mediated endocytosis of mGluR1.** (A) Representative images of surface and internalized myc-mGluR1, 30 min post 100  $\mu$ M R,S-DHPG application in control cells, shTam expressing cells, shTam and wild-type Norbin expressing cells. (B) Quantitation of 100  $\mu$ M R,S-DHPG induced endocytosis of myc-mGluR1 suggested that, knockdown of the endogenous Tamalin led to the inhibition of the endocytosis of myc-mGluR1 and replacement of the endogenous Tamalin with full-length Norbin did not rescue the normal endocytosis of the receptor (n values: control = 22, control + DHPG = 23, shTam + DHPG = 25, shTam:Norbin + DHPG = 16). All the results represented as means  $\pm$  SEM. Scale bar = 10  $\mu$ m. \*\*\* indicates  $p < 0.001$ .

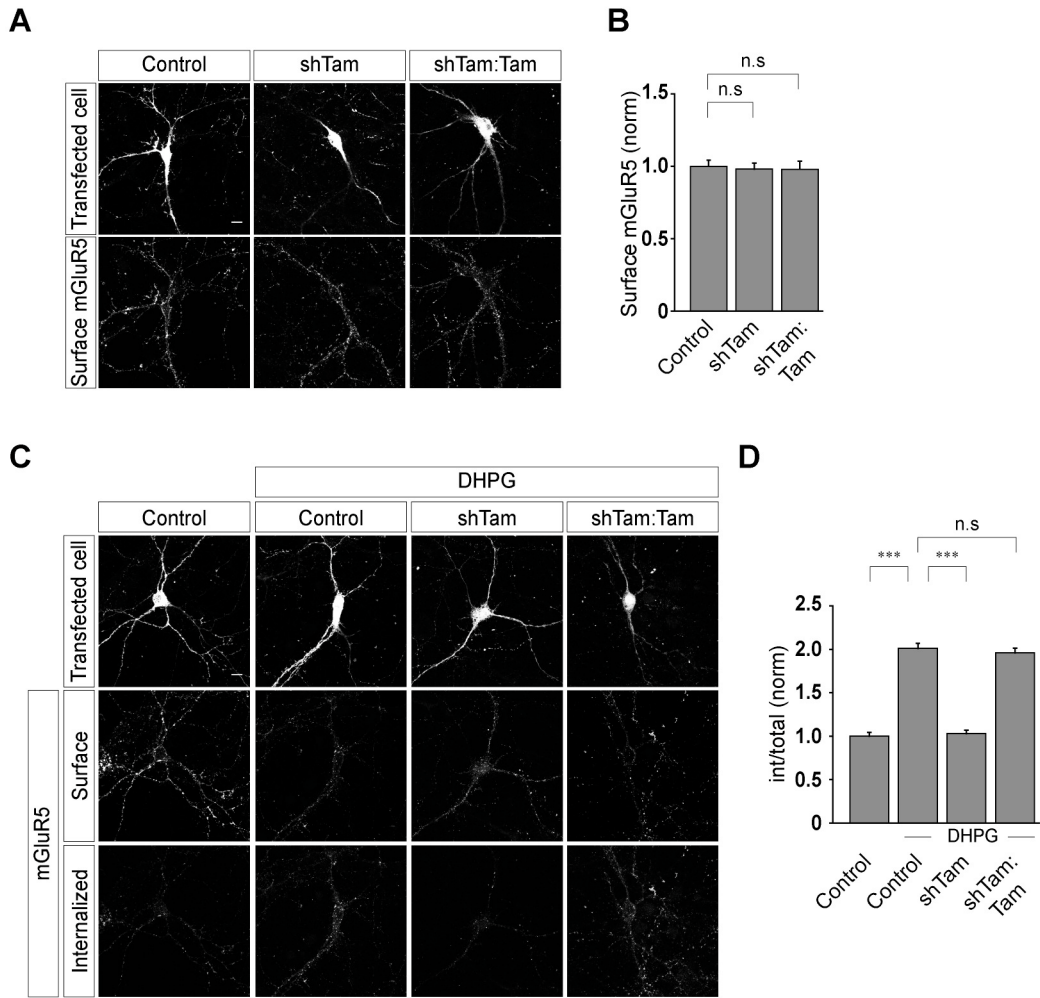

Figure S2

**Figure S2. Knockdown of the endogenous Tamalin leads to the inhibition in the ligand-mediated endocytosis of mGluR5.** (A) Representative images showing surface expression of myc-mGluR5 in control cells, shTam and shTam:Tam expressing cells. (B) Quantitation of myc-mGluR5 surface expression suggested that knockdown of the endogenous Tamalin and expression of the Tamalin replacement construct had no effect on the surface localization of myc-mGluR5 (n values: control = 31, shTam = 33, shTam:Tam = 30). (C) Representative images showing inhibition in the R,S-DHPG-mediated myc-mGluR5 endocytosis upon knockdown of the endogenous Tamalin and rescue of the endocytosis on expression of the Tamalin replacement construct. (D) Quantitation also suggested that knockdown of the endogenous Tamalin led to the inhibition in the ligand-mediated endocytosis of myc-mGluR5 which was rescued by the expression of the Tamalin replacement construct (n values: control = 31, control + DHPG = 32, shTam + DHPG = 32, shTam:Tam + DHPG = 32). All the results represented as means  $\pm$  SEM. Scale bar = 10  $\mu$ m. \*\*\* indicates  $p < 0.001$  and n.s indicates  $p > 0.05$ .

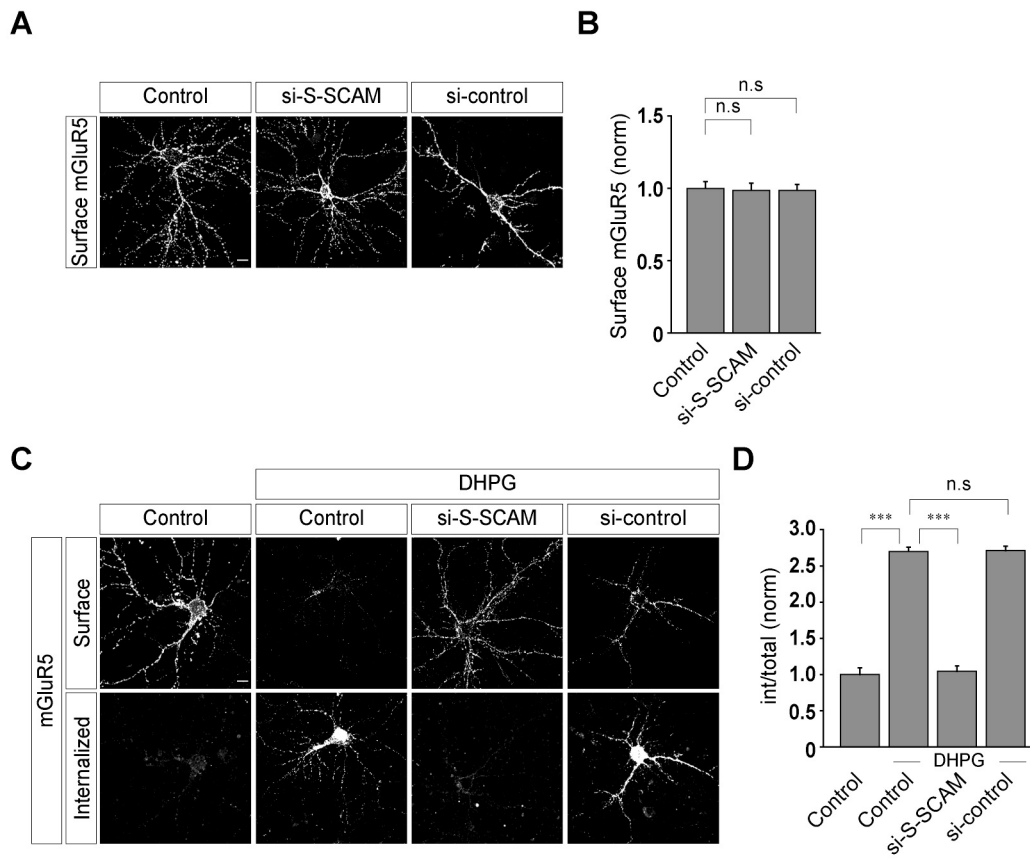

**Figure S3**

**Figure S3. S-SCAM plays critical role in the ligand-mediated internalization of mGluR5.** (A, B) Representative cells (A) and quantitation (B) suggested that acute knockdown of the endogenous S-SCAM had no effect on the surface expression of myc-mGluR5 (n values: control = 21, si-S-SCAM = 21, si-control = 21). (C, D) Representative images (C) and quantitation of the endocytosis index (D) suggested that knockdown of the endogenous S-SCAM led to the inhibition in the R,S-DHPG-mediated internalization of myc-mGluR5, whereas, in control cells and si-control transfected cells the receptor endocytosed normally (n values: control = 21, control + DHPG = 21, si-S-SCAM + DHPG = 20, si-control + DHPG = 20). All the results represented as means  $\pm$  SEM. Scale bar = 10  $\mu$ m. \*\*\* indicates  $p < 0.001$  and n.s indicates  $p > 0.05$ .

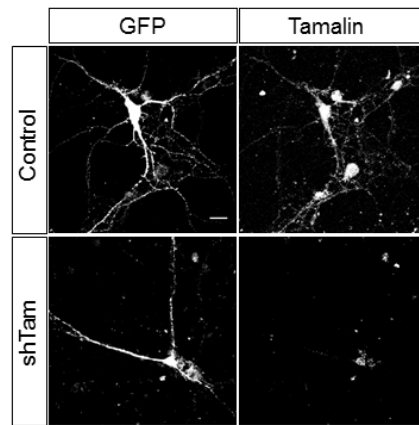

Figure S4



**Figure S4: Knockdown of the endogenous Tamalin in primary hippocampal neurons.** Representative images showing knockdown of the endogenous Tamalin by shTam in primary hippocampal neurons. Scale bar = 10  $\mu$ m.

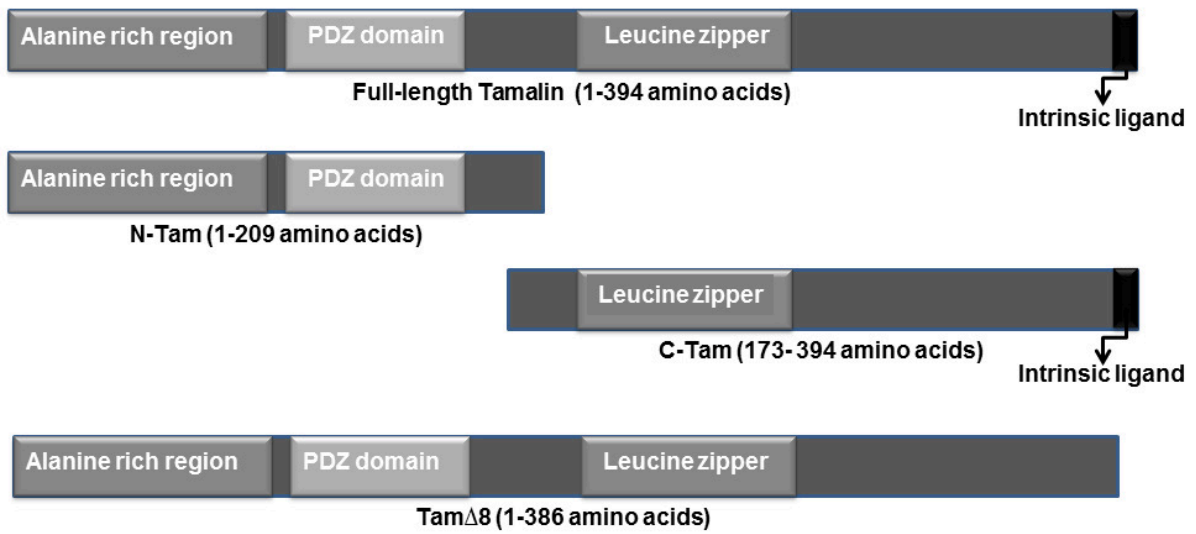

Figure S5

**Figure S5. Schematic of various Tamalin constructs.**
